# Supplementary material
Source: publisher figshare collection journal article supplement (https://acs.figshare.com/ndownloader/files/3899038)
Supplement: Supplementary file 1 [file 3899038]

**Supporting Information for:**

**Release of Colloids from Primary Minimum  
Contact Under Unfavorable Conditions by  
Perturbations in Ionic Strength and Flow Rate**

*Eddy Pazmino, Jacob Trauscht and William P. Johnson<sup>1</sup>*

Department of Geology and Geophysics, University of Utah, Salt Lake City, Utah 84112, United States

---

<sup>1</sup> Corresponding author. Email: [william.johnson@utah.edu](mailto:william.johnson@utah.edu); Tel: (801)585-5033; Fax: (801)581-7065.

*Fluid flow fields of loading jet velocity and 5x and 25x perturbations*

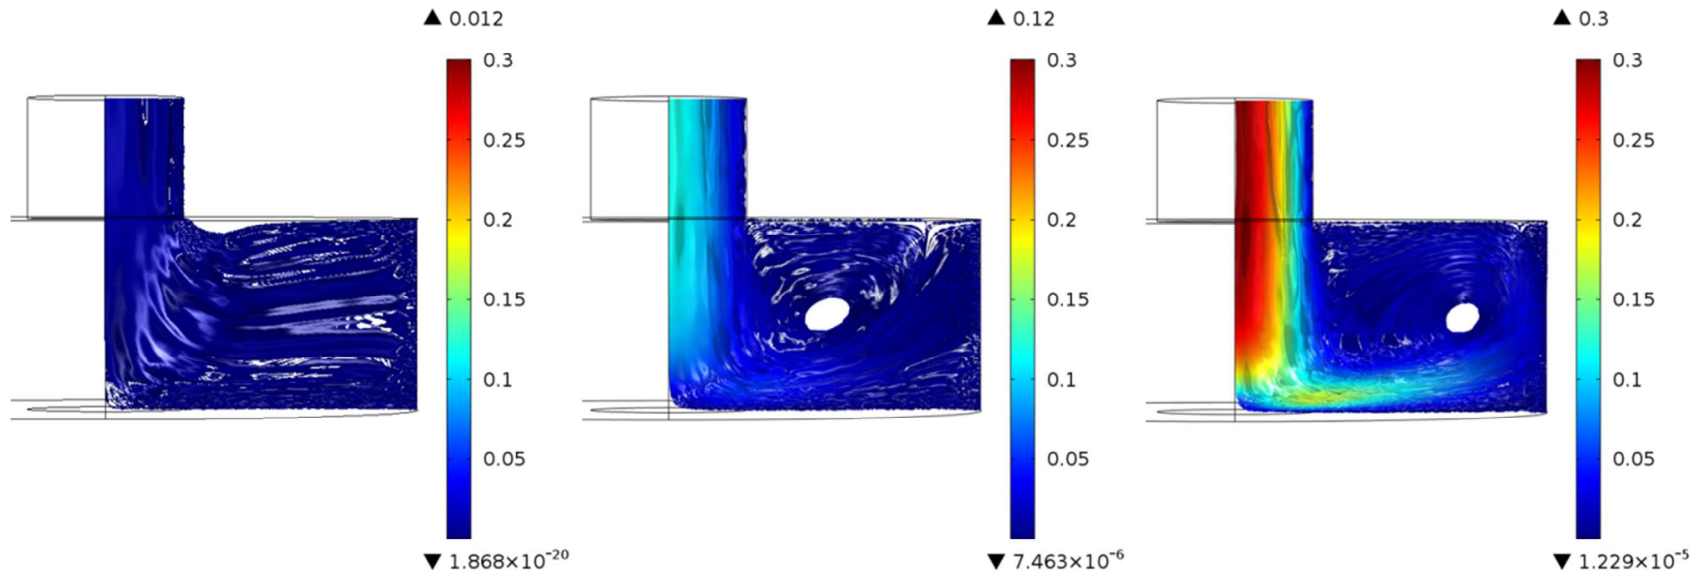

**Figure SI-1.** Velocity flow field streamlines under laminar conditions. Left: nominal loading jet velocity ( $v_{\text{jet}} = 5.94 \times 10^{-3} \text{ ms}^{-1}$ ). Center: 10x flow relative to loading. Right: 25x flow relative to loading. Color map shows velocity values in  $\text{ms}^{-1}$ . Up arrow and down arrow values on legend indicate maximum and minimum velocities in each flow field. The numerical flow fields were solved via the Navier-Stokes equations for a single phase laminar flow model using finite-element computational software.<sup>4</sup>

*Distribution of fractional areas occupied by heterodomains interacting with immobilized colloids*

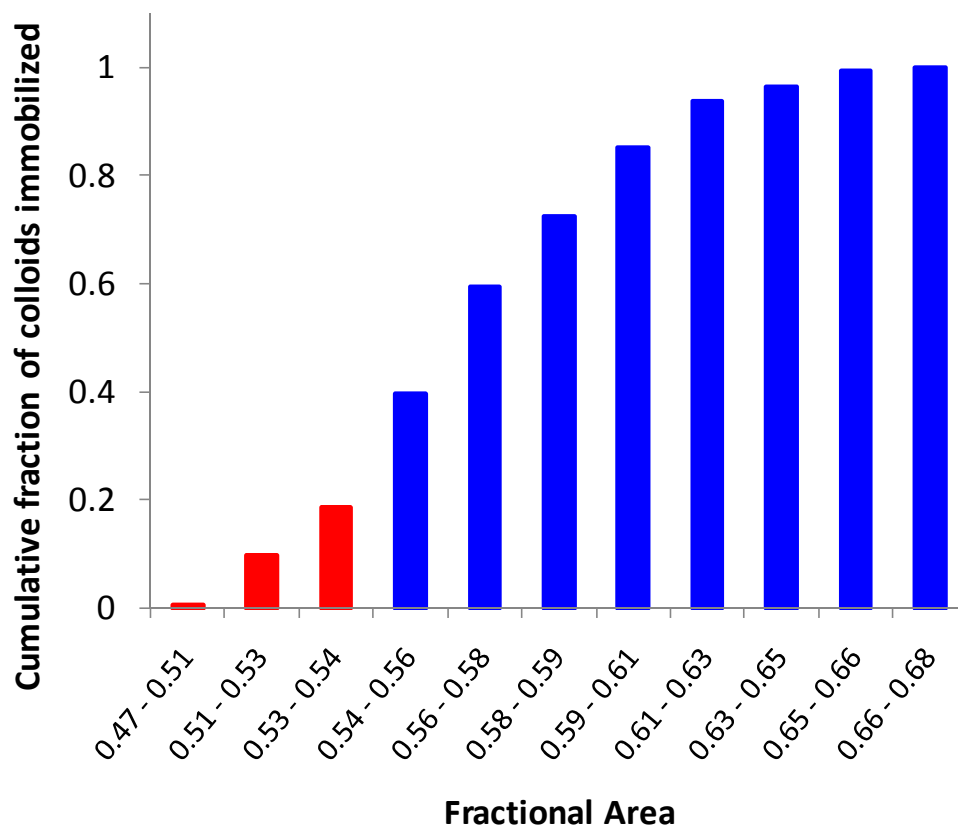

**Figure SI-2.** Cumulative distribution of fractional areas occupied by heterodomains in the zone of influence (ZOI) for 1.95  $\mu\text{m}$  immobilized colloids loaded at 20 mM IS,  $1.7 \times 10^{-3} \text{ ms}^{-1}$  average jet velocity. Red denotes the fraction of the colloids prone to release in response to IS reduction (20 to 1 mM). Blue denotes the fraction of the colloids that remains attached. Simulated heterogeneity involved 120 and 60 nm radii heterodomains at 1 to 4 number ratio, respectively, at surface coverage 0.04%.

### *Electric double layer interaction*

The electric double layer force between colloid-collector was calculated from the energy expression developed by Lin and Weisner<sup>1</sup> for a sphere-plate geometry:

$$W_{sphere-plate} = \frac{64\pi\epsilon}{\kappa} \left( \frac{k_B T}{ze} \right) \tanh\left(\frac{ze\psi_c}{4k_B T}\right) \tanh\left(\frac{ze\psi_p}{4k_B T}\right) \left[ (\kappa a_p - 1)e^{-\kappa H} + (\kappa a_p + 1)e^{-\kappa(H+2a_p)} \right]$$

where  $\epsilon$  is the absolute electric permittivity of water,  $\kappa$  is the inverse Debye length,  $k_B$  is the Boltzmann constant,  $T$  the absolute temperature,  $e$  the elementary charge,  $z$  the electrolyte valance  $\psi_c$  and  $\psi_p$  the zeta potentials of collector and colloid,  $a_p$  is the colloid radius and  $H$  is the separation distance. The electric double layer force corresponds to the derivative of the above expression with respect to  $H$ :

$$F_{sphere-plate} = 64\pi\epsilon \left( \frac{k_B T}{ze} \right) \tanh\left(\frac{ze\psi_c}{4k_B T}\right) \tanh\left(\frac{ze\psi_p}{4k_B T}\right) \left[ (\kappa a_p - 1)e^{-\kappa H} + (\kappa a_p + 1)e^{-\kappa(H+2a_p)} \right]$$

### *Van der Waals interaction*

The retarded van der Waals force was calculated from the energy expression provided by Gregory<sup>2</sup> for a sphere plate geometry:

$$W_{sphere-plate} = - \frac{A_{132}a_p}{6H} \left[ 1 - \frac{5.32H}{\lambda} \ln\left(1 + \frac{\lambda}{5.32H}\right) \right]$$

where  $A_{132}$  is the Hamaker constant and  $\lambda$  is the characteristic wavelength. The van der Waals force corresponds to the derivative of the above expression with respect to  $H$ :

$$F_{sphere-plate} = - \frac{A_{132}a_p}{6H^2} \left[ 6H^2 \left( 1 + \frac{5.32H}{\lambda} \right) \right]$$

### *Steric interaction*

The steric force was calculated from the expression provided by Israelavichli<sup>3</sup> which corresponds to the energy per unit area between two plates:

$$w_{plate-plate} = W_0 e^{-\frac{H}{\lambda_0}}$$

The steric force was calculated via the Derjaguin approximation yielding:

$$F_{sphere-plate} = 2\pi a_p W_0 e^{-\frac{H}{\lambda_0}}$$

where  $\lambda_0$  is the decay length and  $W_0$  the maximum repulsive energy per unit area.

### *Time-lapse images*

A time-lapse image acquisition is provided as a movie: “*Colloid reentrainment 1.7e-3 ms-1 1.95  $\mu$ m 20mM to 1 mM.avi*”, which shows release of 1.95  $\mu$ m colloids in response to reduced ionic strength (20 to 1 mM). This material is available free of charge via the Internet at <http://pubs.acs.org>.

### **References:**

- (1) Lin, S.; Wiesner, M. R., Paradox of Stability of Nanoparticles at Very Low Ionic Strength. *Langmuir* **2012**, 28 (30), 11032-11041.
- (2) Gregory, J., Approximate expressions for retarded van der Waals interaction. *Journal of Colloid and Interface Science* **1981**, 83 (1), 138-45.
- (3) Israelachvili, J. N., *Intermolecular and Surface Forces: Revised Third Edition*. Elsevier Science: **2011**; pp 342-370.
- (4) COMSOL Multiphysics™, <http://www.comsol.com>.
